# Supplementary material for: Senescence-related gene c-Myc affects bladder cancer cell senescence by interacting with HSP90B1 to regulate cisplatin sensitivity
Source: Aging (Albany NY). 2023 Jul 10;15(15):7408–23. doi: 10.18632/aging.204863 (PMC10457043; doi:10.18632/aging.204863)
Supplement: Supplementary Table 1 [file aging-15-204863-s001.xlsx]

## Sheet: Table 1
Supplementary Table 1. Genes interacting with c-Myc.
Symbol A	Symbol B	Rank	Source Databases	Direct	Indirect
MYC	BIN1	high	BioGrid, HPRD, IntAct, mentha	x-ray crystallography(MI:0114)	complex(MI:0314)
				two hybrid(MI:0018)	western blot(MI:0113)
				nuclear magnetic resonance(MI:0077)	in vitro(MI:0492)
					in vivo(MI:0493)
					anti bait coimmunoprecipitation(MI:0006)
MYC	BRCA1	high	BioGrid, DIP, HPRD, IntAct, mentha	two hybrid(MI:0018)	complex(MI:0314)
					colocalization(MI:0403)
					chromatin immunoprecipitation assay(MI:0402)
					western blot(MI:0113)
					affinity chromatography technology(MI:0004)
					proximity labelling technology (MI:1313)
					in vitro(MI:0492)
					in vivo(MI:0493)
					coimmunoprecipitation(MI:0019)
MYC	CAPZB	high	BioGrid, HumanMAPK	physical association(MI:0915)	detection by mass spectrometry(MI:0943)
MYC	CDK4	high	BioGrid, IntAct, mentha	two hybrid array(MI:0397)	biochemical(MI:0401)
				two hybrid(MI:0018)	protein kinase assay(MI:0424)
				fluorescent resonance energy transfer(MI:0055)	chromatin immunoprecipitation assay(MI:0402)
MYC	CDK6	high	BioGrid, IntAct, mentha	fluorescent resonance energy transfer(MI:0055)	biochemical(MI:0401)
					protein kinase assay(MI:0424)
MYC	CDKN1B	high	BioGrid, HumanMAPK, mentha	protein complementation assay(MI:0090)	western blot(MI:0113)
				physical association(MI:0915)
MYC	CDKN2A	high	BioGrid, HPRD, mentha	fluorescent resonance energy transfer(MI:0055)	colocalization(MI:0403)
					western blot(MI:0113)
					complex(MI:0314)
					in vivo(MI:0493)
MYC	CDR2	high	mentha, BioGrid	two hybrid(MI:0018)	western blot(MI:0113)
					complex(MI:0314)
MYC	CREBBP	high	BioGrid, HPRD, mentha	two hybrid(MI:0018)	detection by mass spectrometry(MI:0943)
					complex(MI:0314)
					biochemical(MI:0401)
					western blot(MI:0113)
					in vitro(MI:0492)
					in vivo(MI:0493)
MYC	DNMT1	high	IntAct, BioGrid	chromatin immunoprecipitation array(MI:0225)	detection by mass spectrometry(MI:0943)
					proximity labelling technology (MI:1313)
					chromatin immunoprecipitation assay(MI:0402)
MYC	DNMT3B	high	IntAct	chromatin immunoprecipitation array(MI:0225)	chromatin immunoprecipitation assay(MI:0402)
MYC	EZH2	high	mentha, BioGrid, IntAct	chromatin immunoprecipitation array(MI:0225)	chromatin immunoprecipitation assay(MI:0402)
					western blot(MI:0113)
MYC	KAT2A	high	BioGrid, DIP, HPRD, mentha	fluorescent resonance energy transfer(MI:0055)	western blot(MI:0113)
					biochemical(MI:0401)
					complex(MI:0314)
					affinity chromatography technology(MI:0004)
					coimmunoprecipitation(MI:0019)
					in vivo(MI:0493)
MYC	GSK3B	high	BioGrid, DIP, HPRD, IntAct, mentha	Split renilla luciferase complementation(MI:1037)	detection by mass spectrometry(MI:0943)
					tandem affinity purification(MI:0676)
					anti tag coimmunoprecipitation(MI:0007)
					anti bait coimmunoprecipitation(MI:0006)
					western blot(MI:0113)
					in vitro(MI:0492)
					in vivo(MI:0493)
MYC	H2AFX	high	IntAct	chromatin immunoprecipitation array(MI:0225)	chromatin immunoprecipitation assay(MI:0402)
MYC	HDAC2	high	BioGrid, IntAct, mentha	display technology(MI:0034)	western blot(MI:0113)
					proximity labelling technology (MI:1313)
					detection by mass spectrometry(MI:0943)
					tandem affinity purification(MI:0676)
MYC	HIF1A	high	BioGrid, mentha	fluorescent resonance energy transfer(MI:0055)	western blot(MI:0113)
MYC	HSP90AB1	high	BioGrid, HumanMAPK	physical association(MI:0915)	detection by mass spectrometry(MI:0943)
MYC	KPNA2	high	BioGrid, IntAct, mentha	two hybrid(MI:0018)	detection by mass spectrometry(MI:0943)
				two hybrid array(MI:0397)	tandem affinity purification(MI:0676)
					proximity labelling technology (MI:1313)
MYC	SMAD2	high	BioGrid, HPRD, mentha	two hybrid(MI:0018)	western blot(MI:0113)
				fluorescent resonance energy transfer(MI:0055)	complex(MI:0314)
					in vitro(MI:0492)
					in vivo(MI:0493)
MYC	SMAD3	high	BioGrid, HPRD, mentha	two hybrid(MI:0018)	western blot(MI:0113)
					complex(MI:0314)
					in vitro(MI:0492)
					in vivo(MI:0493)
MYC	MAX	high	BioGrid, DIP, HPRD, HumanMAPK, IntAct, mentha	two hybrid prey pooling approach (MI:1112)	detection by mass spectrometry(MI:0943)
				nuclear magnetic resonance(MI:0077)	complex(MI:0314)
				physical association(MI:0915)	tandem affinity purification(MI:0676)
				two hybrid array(MI:0397)	anti tag coimmunoprecipitation(MI:0007)
				x-ray crystallography(MI:0114)	anti bait coimmunoprecipitation(MI:0006)
				proximity enzyme linked immunosorbent assay(MI:0813)	western blot(MI:0113)
				two hybrid(MI:0018)	affinity chromatography technology(MI:0004)
				fluorescent resonance energy transfer(MI:0055)	field flow fractionation(MI:1022)
				validated two hybrid (MI:1356)	proximity labelling technology (MI:1313)
				two hybrid pooling approach(MI:0398)	in vitro(MI:0492)
					in vivo(MI:0493)
					coimmunoprecipitation(MI:0019)
MYC	MCM7	high	BioGrid, IntAct, mentha	two hybrid(MI:0018)	detection by mass spectrometry(MI:0943)
					tandem affinity purification(MI:0676)
					anti tag coimmunoprecipitation(MI:0007)
					anti bait coimmunoprecipitation(MI:0006)
					western blot(MI:0113)
					proximity labelling technology (MI:1313)
MYC	MLH1	high	BioGrid, HPRD, mentha	two hybrid(MI:0018)	western blot(MI:0113)
					in vivo(MI:0493)
					detection by mass spectrometry(MI:0943)
					in vitro(MI:0492)
					complex(MI:0314)
MYC	MSH2	high	BioGrid, IntAct, mentha	fluorescent resonance energy transfer(MI:0055)	western blot(MI:0113)
					proximity labelling technology (MI:1313)
					detection by mass spectrometry(MI:0943)
					tandem affinity purification(MI:0676)
MYC	MYC	high	BioGrid, IntAct, mentha	fluorescent resonance energy transfer(MI:0055)	detection by mass spectrometry(MI:0943)
					tandem affinity purification(MI:0676)
MYC	NAP1L1	high	mentha, BioGrid, IntAct	display technology(MI:0034)	detection by mass spectrometry(MI:0943)
MYC	NFYC	high	BioGrid, HPRD, mentha	two hybrid(MI:0018)	complex(MI:0314)
					western blot(MI:0113)
					in vitro(MI:0492)
					in vivo(MI:0493)
MYC	PRDX1	high	BioGrid, HPRD, IntAct, mentha	two hybrid(MI:0018)	detection by mass spectrometry(MI:0943)
				two hybrid array(MI:0397)	in vitro(MI:0492)
					in vivo(MI:0493)
MYC	PFDN5	high	BioGrid, DIP, HPRD, HumanMAPK, IntAct, mentha	two hybrid(MI:0018)	complex(MI:0314)
				physical association(MI:0915)	western blot(MI:0113)
					affinity chromatography technology(MI:0004)
					in vitro(MI:0492)
					in vivo(MI:0493)
					anti tag coimmunoprecipitation(MI:0007)
MYC	PIN1	high	BioGrid, DIP, IntAct, mentha	surface plasmon resonance(MI:0107)	detection by mass spectrometry(MI:0943)
				isothermal titration calorimetry(MI:0065)	western blot(MI:0113)
				nuclear magnetic resonance(MI:0077)	anti bait coimmunoprecipitation(MI:0006)
MYC	PSMC3	high	BioGrid, IntAct, mentha	two hybrid(MI:0018)	detection by mass spectrometry(MI:0943)
					tandem affinity purification(MI:0676)
MYC	RAF1	high	BioGrid, HPRD, IntAct, mentha	fluorescent resonance energy transfer(MI:0055)	complex(MI:0314)
					detection by mass spectrometry(MI:0943)
					in vitro(MI:0492)
					tandem affinity purification(MI:0676)
MYC	RB1	high	BioGrid, HPRD, mentha	two hybrid(MI:0018)	detection by mass spectrometry(MI:0943)
				fluorescent resonance energy transfer(MI:0055)	in vivo(MI:0493)
					proximity labelling technology (MI:1313)
MYC	RELA	high	BioGrid, HPRD, mentha	fluorescent resonance energy transfer(MI:0055)	western blot(MI:0113)
					in vivo(MI:0493)
MYC	SKP1	high	BioGrid, IntAct, mentha	two hybrid(MI:0018)	detection by mass spectrometry(MI:0943)
				two hybrid array(MI:0397)	tandem affinity purification(MI:0676)
					anti bait coimmunoprecipitation(MI:0006)
					western blot(MI:0113)
					proximity labelling technology (MI:1313)
MYC	SKP2	high	BioGrid, HPRD, IntAct, mentha	protein complementation assay(MI:0090)	western blot(MI:0113)
					complex(MI:0314)
					in vivo(MI:0493)
					anti bait coimmunoprecipitation(MI:0006)
MYC	SMARCA4	high	BioGrid, IntAct, mentha	fluorescent resonance energy transfer(MI:0055)	detection by mass spectrometry(MI:0943)
					complex(MI:0314)
					anti bait coimmunoprecipitation(MI:0006)
					western blot(MI:0113)
					proximity labelling technology (MI:1313)
MYC	SMARCB1	high	BioGrid, HPRD, mentha	two hybrid(MI:0018)	complex(MI:0314)
					western blot(MI:0113)
					in vitro(MI:0492)
					in vivo(MI:0493)
MYC	SNRNP70	high	BioGrid, IntAct, mentha	display technology(MI:0034)	complex(MI:0314)
MYC	TOP1	high	BioGrid, IntAct, mentha	display technology(MI:0034)	detection by mass spectrometry(MI:0943)
					tandem affinity purification(MI:0676)
					proximity labelling technology (MI:1313)
MYC	TP53	high	BioGrid, IntAct, mentha	fluorescent resonance energy transfer(MI:0055)	detection by mass spectrometry(MI:0943)
					tandem affinity purification(MI:0676)
					proximity labelling technology (MI:1313)
MYC	TP53BP1	high	mentha, BioGrid, IntAct	display technology(MI:0034)	proximity-dependent biotin identification (MI:1314)
					detection by mass spectrometry(MI:0943)
					proximity labelling technology (MI:1313)
MYC	TP73	high	BioGrid, HPRD, mentha	two hybrid(MI:0018)	western blot(MI:0113)
					complex(MI:0314)
					in vitro(MI:0492)
					in vivo(MI:0493)
MYC	HSP90B1	high	BioGrid, HumanMAPK	physical association(MI:0915)	detection by mass spectrometry(MI:0943)
MYC	UBTF	high	mentha, BioGrid, IntAct	display technology(MI:0034)	detection by mass spectrometry(MI:0943)
					tandem affinity purification(MI:0676)
					proximity labelling technology (MI:1313)
MYC	YY1	high	BioGrid, DIP, HPRD, mentha	two hybrid(MI:0018)	complex(MI:0314)
					affinity chromatography technology(MI:0004)
					in vitro(MI:0492)
MYC	ZNF121	high	BioGrid, IntAct, mentha	two hybrid(MI:0018)	detection by mass spectrometry(MI:0943)
					tandem affinity purification(MI:0676)
MYC	ZBTB17	high	BioGrid, HPRD, IntAct, mentha	two hybrid(MI:0018)	complex(MI:0314)
					western blot(MI:0113)
					in vitro(MI:0492)
					in vivo(MI:0493)
					anti bait coimmunoprecipitation(MI:0006)
					anti tag coimmunoprecipitation(MI:0007)
					pull down(MI:0096)
MYC	BRD3	high	BioGrid, IntAct, mentha	display technology(MI:0034)	complex(MI:0314)
					tandem affinity purification(MI:0676)
MYC	NMI	high	BioGrid, HPRD, IntAct, mentha	two hybrid(MI:0018)	western blot(MI:0113)
				beta galactosidase complementation(MI:0010)	complex(MI:0314)
					in vivo(MI:0493)
MYC	CEP57	high	BioGrid, IntAct, mentha	display technology(MI:0034)	complex(MI:0314)
					tandem affinity purification(MI:0676)
MYC	GCN1	high	BioGrid, HumanMAPK, IntAct, mentha	two hybrid(MI:0018)	detection by mass spectrometry(MI:0943)
				physical association(MI:0915)	tandem affinity purification(MI:0676)
				two hybrid pooling approach(MI:0398)
MYC	ACIN1	high	BioGrid, HumanMAPK	physical association(MI:0915)	detection by mass spectrometry(MI:0943)
MYC	KDM2A	high	BioGrid, HumanMAPK	physical association(MI:0915)	detection by mass spectrometry(MI:0943)
MYC	KDM1A	high	BioGrid, IntAct, mentha	two hybrid prey pooling approach (MI:1112)	detection by mass spectrometry(MI:0943)
				two hybrid array(MI:0397)	proximity labelling technology (MI:1313)
				two hybrid(MI:0018)
				validated two hybrid (MI:1356)
MYC	MYCBP2	high	BioGrid, DIP, HPRD, mentha	far western blotting(MI:0047)	western blot(MI:0113)
				phage display(MI:0084)	affinity chromatography technology(MI:0004)
					detection by mass spectrometry(MI:0943)
					in vitro(MI:0492)
					in vivo(MI:0493)
					coimmunoprecipitation(MI:0019)
MYC	SIN3B	high	mentha, BioGrid, IntAct	proximity enzyme linked immunosorbent assay(MI:0813)	anti bait coimmunoprecipitation(MI:0006)
					chromatin immunoprecipitation assay(MI:0402)
					proximity labelling technology (MI:1313)
					confocal microscopy(MI:0663)
MYC	SIRT1	high	BioGrid, IntAct, mentha	chromatin immunoprecipitation array(MI:0225)	complex(MI:0314)
					western blot(MI:0113)
					anti bait coimmunoprecipitation(MI:0006)
					anti tag coimmunoprecipitation(MI:0007)
					deacetylase assay(MI:0406)
					chromatin immunoprecipitation assay(MI:0402)
MYC	SF3B1	high	BioGrid, HumanMAPK, IntAct, mentha	two hybrid(MI:0018)	detection by mass spectrometry(MI:0943)
				physical association(MI:0915)
				two hybrid pooling approach(MI:0398)
MYC	ZNF281	high	BioGrid, IntAct, mentha	two hybrid(MI:0018)	western blot(MI:0113)
					proximity labelling technology (MI:1313)
					detection by mass spectrometry(MI:0943)
					tandem affinity purification(MI:0676)
MYC	LDOC1	high	BioGrid, IntAct, mentha	display technology(MI:0034)	complex(MI:0314)
MYC	FBXW8	high	BioGrid, IntAct, mentha	two hybrid(MI:0018)	detection by mass spectrometry(MI:0943)
					western blot(MI:0113)
					anti tag coimmunoprecipitation(MI:0007)
					tandem affinity purification(MI:0676)
MYC	MYCBP	high	BioGrid, HPRD, IntAct, mentha	two hybrid(MI:0018)	complex(MI:0314)
					western blot(MI:0113)
					in vitro(MI:0492)
					in vivo(MI:0493)
MYC	HBP1	high	BioGrid, mentha	two hybrid(MI:0018)	western blot(MI:0113)
MYC	DNTTIP2	high	BioGrid, HumanMAPK	physical association(MI:0915)	detection by mass spectrometry(MI:0943)
					proximity labelling technology (MI:1313)
MYC	FZR1	high	mentha, BioGrid, IntAct	fluorescent resonance energy transfer(MI:0055)	tandem affinity purification(MI:0676)
MYC	LARS	high	BioGrid, HumanMAPK	physical association(MI:0915)	detection by mass spectrometry(MI:0943)
MYC	CDCA7L	high	mentha, IntAct, DIP, BioGrid	two hybrid(MI:0018)	western blot(MI:0113)
					complex(MI:0314)
					anti bait coimmunoprecipitation(MI:0006)
MYC	CDK5RAP2	high	HumanMAPK, IntAct, mentha	physical association(MI:0915)	tandem affinity purification(MI:0676)
MYC	GATAD2B	high	BioGrid, HumanMAPK	physical association(MI:0915)	proximity labelling technology (MI:1313)
MYC	KIDINS220	high	BioGrid, IntAct, mentha	display technology(MI:0034)	complex(MI:0314)
MYC	CCAR2	high	BioGrid, IntAct, mentha	two hybrid(MI:0018)	detection by mass spectrometry(MI:0943)
					complex(MI:0314)
					tandem affinity purification(MI:0676)
					anti tag coimmunoprecipitation(MI:0007)
					anti bait coimmunoprecipitation(MI:0006)
					western blot(MI:0113)
					proximity labelling technology (MI:1313)
					cosedimentation through density gradient(MI:0029)
MYC	SNIP1	high	BioGrid, HPRD, IntAct, mentha	two hybrid(MI:0018)	western blot(MI:0113)
					in vitro(MI:0492)
					in vivo(MI:0493)
					anti bait coimmunoprecipitation(MI:0006)
					anti tag coimmunoprecipitation(MI:0007)
					pull down(MI:0096)
MYC	USP48	high	HumanMAPK, IntAct, mentha	physical association(MI:0915)	tandem affinity purification(MI:0676)
MYC	TRIM6	high	BioGrid, mentha	two hybrid(MI:0018)	western blot(MI:0113)
MYC	MAP2K3	high	BioGrid	fluorescent resonance energy transfer(MI:0055)	western blot(MI:0113)
					detection by mass spectrometry(MI:0943)
MYC	MIF4GD	high	IntAct	two hybrid(MI:0018)	pull down(MI:0096)
MYC	TSC1	high	BioGrid	fluorescent resonance energy transfer(MI:0055)	detection by mass spectrometry(MI:0943)
